# Supplementary material for: Efficient Gene Disruption in Diverse Strains of Toxoplasma gondii Using CRISPR/CAS9
Source: PubMed Central journal article supplement — mBio. 2014 May 13;5(3):e01114-14. doi: 10.1128/mBio.01114-14 (PMC4030483; doi:10.1128/mbio.01114-14), 2014-05-13
Supplement: mbo002141824st1.pdf [file mbo002141824st1.pdf]

**Table S1. Plasmids used in this study.**

| <b>Plasmid</b>             | <b>Description</b>                                                                                                                                     | <b>Used for</b>                                                  |
|----------------------------|--------------------------------------------------------------------------------------------------------------------------------------------------------|------------------------------------------------------------------|
| pSAG1::CAS9-U6::sgUPRT     | CAS9 expressed from the <i>SAG1</i> promoter and CRISPR gRNA targeting <i>UPRT</i> produced from the <i>U6</i> promoter                                | CRISPR plasmid targeting <i>UPRT</i>                             |
| pSAG1::CAS9-U6::sgUPRT-OT1 | A derivative of pSAG1::CAS9-U6::sgUPRT, containing two mutations in the <i>UPRT</i> targeting gRNA                                                     | Specificity control for pSAG1::CAS9-U6::sgUPRT                   |
| pSAG1::CAS9-U6::sgUPRT-OT2 | A derivative of pSAG1::CAS9-U6::sgUPRT, containing two mutations in the <i>UPRT</i> targeting gRNA                                                     | Specificity control for pSAG1::CAS9-U6::sgUPRT                   |
| pSAG1::CAS9-U6::sgROP18    | CAS9 expressed from the <i>SAG1</i> promoter and CRISPR gRNA targeting <i>ROP18</i> produced from the <i>U6</i> promoter                               | CRISPR plasmid targeting <i>ROP18</i>                            |
| pUPRT::DHFR-I              | DHFR* cassette flanked by two homology arms from <i>UPRT</i> close to the gRNA( <i>UPRT</i> ) targeting region                                         | Inserting <i>DHFR*</i> into <i>UPRT</i>                          |
| pUPRT::DHFR-D              | DHFR* cassette flanked by two homology arms from the 5'- and 3'-UTR of <i>UPRT</i> gene respectively                                                   | Replacing the <i>UPRT</i> gene by <i>DHFR*</i>                   |
| pROP18::DHFR               | DHFR* cassette flanked by two homology arms from <i>ROP18</i> close to the gRNA( <i>ROP18</i> ) targeting region                                       | Inserting <i>DHFR*</i> into <i>ROP18</i>                         |
| pUPRT::IMC1-ROP18          | A cassette expressing <i>ROP18</i> from the <i>IMC1</i> promoter flanked by two homology arms from the 5'- and 3'-UTR of <i>UPRT</i> gene respectively | To complement a <i>rop18</i> mutant at the <i>UPRT</i> locus     |
| pDONR-P4P1r-UpgRNA         | A 750 bp fragment upstream the gRNA target in <i>UPRT</i> gene cloned into the donor vector pDONR-P4P1r                                                | LR ligation making pUPRT::DHFR-I                                 |
| pDONR-P2rP3-DngRNA         | A 900 bp fragment downstream the gRNA target in <i>UPRT</i> gene cloned into the donor vector pDONR-P2rP3                                              |                                                                  |
| pDONR-P1P2-DHFR*           | DHFR* cassette cloned into the donor vector pDONR-P1P2                                                                                                 | LR ligation making pUPRT::DHFR-I, pUPRT::DHFR-D and pROP18::DHFR |

|                     |                                                                                                           |                                  |
|---------------------|-----------------------------------------------------------------------------------------------------------|----------------------------------|
| pDONR-P4P1r-U5UPRT  | The 5'-UTR region (1Kb) of the <i>UPRT</i> gene cloned into the donor vector pDONR-P4P1r                  | LR ligation making pUPRT::DHFR-D |
| pDONR-P2rP3-U3UPRT  | The 3'-UTR region (1Kb) of the <i>UPRT</i> gene cloned into the donor vector pDONR-P2rP3                  |                                  |
| pDONR-P4P1r-UpROP18 | A 820 bp fragment upstream the gRNA target in <i>UPRT</i> gene cloned into the donor vector pDONR-P4P1r   | LR ligation making pROP18::DHFR  |
| pDONR-P2rP3-DnROP18 | A 850 bp fragment downstream the gRNA target in <i>UPRT</i> gene cloned into the donor vector pDONR-P2rP3 |                                  |
