# Supplementary material for: Efficient Gene Disruption in Diverse Strains of Toxoplasma gondii Using CRISPR/CAS9
Source: PubMed Central journal article supplement — mBio. 2014 May 13;5(3):e01114-14. doi: 10.1128/mBio.01114-14 (PMC4030483; doi:10.1128/mbio.01114-14), 2014-05-13
Supplement: mbo002141824st2.pdf [file mbo002141824st2.pdf]

**Table S2. Primers used in this study**

| Primers       | Sequence                                                                                                                                | Used for                                                                                                                   |
|---------------|-----------------------------------------------------------------------------------------------------------------------------------------|----------------------------------------------------------------------------------------------------------------------------|
| 5'-pU6-SacI   | CCGAGCTCAAGTAAGCAGAAGCACGC                                                                                                              | To clone U6-sgRNA(UPRT) into pSAG-Ble-SAG                                                                                  |
| 3'-gRNA-SacI  | GCGAGCTCAAAAAGCACCGACTCGGTGCCACT<br>TTTTCAAGTTGATAACGGACTAGCCTTATTTAA<br>CTTGCTATTTCTAGCTCTAAAACGCTCTCACAAT<br>CGAGACGCCAACTTGACATCCCCA |                                                                                                                            |
| 5'-CAS9-NsiI  | CCATGCATCTAGACAAAATGGACAAGAAGTACA<br>GCATCG                                                                                             | To clone CAS9-NLS-GFP into pSAG1-U6::sgUPRT                                                                                |
| 3'-CAS9-PacI  | GCTTAATTA ACTACTTGTACAGCTCGTCC                                                                                                          |                                                                                                                            |
| 5'-UpgRNA     | GATCCGCTTCTCTTGTACTGC                                                                                                                   | PCR3                                                                                                                       |
| 3'-DngRNA     | AAGCAGGTGCAGCGGACAAG                                                                                                                    |                                                                                                                            |
| UPRT-seq      | GGAAGCATGCAGCCATATACG                                                                                                                   | To sequence the gRNA targeting region of <i>UPRT</i> gene in FUDR resistant mutants                                        |
| 5'-B4-UpgRNA  | GGGG ACA ACT TTG TAT AGA AAA GTT<br>GAGCTACTCCTGTGTCTGAGTG                                                                              | To produce PCR product for BP cloning making pDONR-P4P1r-UpgRNA; to get the amplicon <i>uprt::DHFR*-I</i> for transfection |
| 3'-B1r-UpgRNA | GGGG AC TGC TTT TTT GTA CAA ACT<br>TGATCTTGGAATAGAAGGAACTCC                                                                             | To produce PCR product for BP cloning making pDONR-P4P1r-UpgRNA                                                            |
| attB1-DHFR-F  | GGGG ACA AGT TTG TAC AAA AAA GCA GGC<br>TTC AAG CTT CGC CAG GCT GTA AAT C                                                               | To produce PCR product for BP cloning making pDONR-P1P2-DHFR*                                                              |
| attB2-DHFR-R  | GGGG AC CAC TTT GTA CAA GAA AGC TGG GTC<br>GGA ATT CAT CCT GCA AGT GCA TAG AAG                                                          |                                                                                                                            |
| 5'-B2r-DngRNA | GGGG ACA GCT TTC TTG TAC AAA GTG<br>GCGAGTCGATGGAAAGCG                                                                                  | To produce PCR product for BP cloning making pDONR-P2rP3-DngRNA                                                            |
| 3'-B3-DngRNA  | GGGG AC AAC TTT GTA TAA TAA AGT<br>TGCTTACGCAGCAGTGACCATG                                                                               | To produce PCR product for BP cloning making pDONR-P2rP3-DngRNA; to get the amplicon <i>uprt::DHFR*-I</i> for transfection |

|                             |                                                            |                                                                                                                             |
|-----------------------------|------------------------------------------------------------|-----------------------------------------------------------------------------------------------------------------------------|
| attB4 UPRT 5' KO - forward  | GGGGACAAC TTTGTATAGAAAAGTTGTCCCGCT<br>GTGCCTAGTATCG        | To produce PCR product for BP cloning making pDONR-P4P1r-U5UPRT                                                             |
| attB1r UPRT 5' KO - reverse | GGGGACTGCTTTTTTTGTACAAACTTGTTTTAGAA<br>GCCCTGTGGA          |                                                                                                                             |
| attB2r UPRT 3' KO - forward | GGGGACAGCTTTCTTGTACAAAGTGGTCGTCTCT<br>AGTTTTTTTGACAGAC     | To produce PCR product for BP cloning making pDONR-P2rP3-U3UPRT                                                             |
| attB3 UPRT 3' KO - reverse  | GGGGACAAC TTTGTATAATAAAGTTGTCGACGT<br>CAACTGTACGAC         |                                                                                                                             |
| UPRT 5' KO - forward        | GCTGTAGAGTTGCCACCC                                         | to get the amplicons <i>uprt::DHFR*-D</i> and <i>uprt::ROP18</i> for transfection                                           |
| UPRT 3' KO - reverse        | GTACGACATCCGAGTGAA                                         |                                                                                                                             |
| 5'-UpUPRT                   | TGCGACTGCATGCGAAAGTAG                                      | PCR1                                                                                                                        |
| 3'-InDHFR                   | TACCAGTCATGGACGAGATCG                                      | PCR1, PCR4, PCR6                                                                                                            |
| 5'-InDHFR                   | ACACGCATGTCTACACGAACC                                      | PCR2, PCR5, PCR7                                                                                                            |
| 3'-DnUPRT                   | GCTACTAACAAGTGACGACG                                       | PCR2                                                                                                                        |
| 5'-UPRT-OT1                 | GGCGTCTCGATTGTGAGACGGTTTTAGAGCTAG<br>AAATAGC               | Q5 mutagenesis changing the gRNA in pSAG1::CAS9-U6::sgUPRT to UPRT-OT1                                                      |
| 5'-UPRT-OT2                 | GGCGTCTCGATTGTGAAGGCGTTTTAGAGCTAG<br>AAATAGC               | Q5 mutagenesis changing the gRNA in pSAG1::CAS9-U6::sgUPRT to UPRT-OT2                                                      |
| 5'-ROP18-gRNA               | TACGCGTACCGTCGTCCGAAGTTTTAGAGCTAG<br>AAATAGC               | Q5 mutagenesis changing the gRNA in pSAG1::CAS9-U6::sgUPRT to gRNA-ROP18                                                    |
| 3'-ROP18-gRNA               | AACTTGACATCCCCATTTAC                                       | Generic reverse primer for Q5 mutagenesis in pSAG1::CAS9-U6::sgUPRT                                                         |
| 5'-B4-UpROP18               | GGGG ACA ACT TTG TAT AGA AAA GTT G<br>ACAGGAAACGCCAACAGACG | To produce PCR product for BP cloning making pDONR-P4P1r-UpROP18; to make the amplicon <i>rop18::DHFR*</i> for transfection |
| 3'-B1r-UpROP18              | GGGG AC TGC TTT TTT GTA CAA ACT<br>TGAGAGGTGGCCGCTGTACCG   | To produce PCR product for BP cloning making pDONR-P4P1r-UpROP18                                                            |
| 5'-B2r-DnROP18              | GGGG ACA GCT TTC TTG TAC AAA GTG                           | To produce PCR product for BP cloning                                                                                       |

|                |                                                               |                                                                                                                                   |
|----------------|---------------------------------------------------------------|-----------------------------------------------------------------------------------------------------------------------------------|
| 5'-B2r-DnROP18 | GGGG ACA GCT TTC TTG TAC AAA GTG<br>GTGGGTTTAGCGACTCTTCTCC    | To produce PCR product for BP cloning<br>making pDONR-P2rP3-DnROP18                                                               |
| 3'-B3-DnROP18  | GGGG AC AAC TTT GTA TAA TAA AGT<br>TGAAGCATAGTCTCATCGGTGG     | To produce PCR product for BP cloning<br>making pDONR-P2rP3-DnROP18; to make<br>the amplicon <i>rop18::DHFR*</i> for transfection |
| 5'-UpUP18      | GATCTTCAGCAGCCTGGTTC                                          | PCR6                                                                                                                              |
| 3'-DnDn18      | CAAACCAATCACGACCTCTG                                          | PCR7                                                                                                                              |
| 5'-InROP18     | AAGTTCTATCGCGCCACTCG                                          | PCR8                                                                                                                              |
| 3'-InROP18     | TTTGCCGATGACGCATCCAG                                          |                                                                                                                                   |
| 5'-UpU5UPRT    | GATAGGGTTACCCTGGTACTC                                         | PCR4                                                                                                                              |
| 3'-DnU3UPRT    | GGTTCGACACTGGTCAGATG                                          | PCR5                                                                                                                              |
| pIMC1-Rev      | GGGGACAACCTTTGTATAGAAAAGTTGGGTGGGT<br>GAGAAAGGAGGGAACAAC      | PCR9                                                                                                                              |
| U3DHFR-For     | CCGCACCACCTAAGTGTAACC                                         | PCR10                                                                                                                             |
| DHFR-20nt-Fw   | CCTTTTATTCCAAGATCTGTAAGCTTCGCCAGGC<br>TGAAA                   | PCR amplification of the DHFR* cassette<br>with 20 bp <i>UPRT</i> homologous arms on each<br>side for transfection                |
| DHFR-20nt-Rv   | CACTTTCCATCGACTCGCCAGGAATTCATCCTGC<br>AAGTGCATAG              |                                                                                                                                   |
| DHFR-0nt-Fw    | GGGGACAAGTTTGTACAAAAAAGCAGGCTTCAA<br>GCTTCGCCAGGCTGTAAATC     | PCR amplification of the DHFR* cassette<br>for transfection                                                                       |
| DHFR-0nt-Rv    | GGGGACCACTTTGTACAAGAAAGCTGGGTCCGA<br>ATTCATCCTGCAAGTGCATAGAAG |                                                                                                                                   |
